## **Digitally Deconstructing Leaves in 3D Using X-ray Microcomputed Tomography and Machine Learning**

Guillaume Th eroux-Rancourt<sup>1\*</sup>, Matthew R. Jenkins<sup>2\*</sup>, Craig R. Brodersen<sup>3</sup>, Andrew McElrone<sup>2</sup>, Elisabeth J. Forrestel<sup>2</sup>, and J. Mason Earles<sup>2+</sup>

\* Authors contributed equally

<sup>1</sup> Institute of Botany, University of Natural Resources and Life Sciences, Vienna, Austria

<sup>2</sup> Department of Viticulture and Enology, University of California, Davis, CA, USA

<sup>3</sup> School of Forestry and Environmental Sciences, Yale University, New Haven, CT, USA

<sup>+</sup> Corresponding author: [jmearles@ucdavis.edu](mailto:jmearles@ucdavis.edu)

*Théroux-Rancourt et al. – Leaf microCT and machine learning*

## **ABSTRACT**

*Premise of the study:* X-ray microcomputed tomography (microCT) can be used to measure 3D leaf internal anatomy, providing a holistic view of tissue organisation. Previously, the substantial time needed for segmenting multiple tissues limited this technique to small datasets, restricting its utility for phenotyping experiments and limiting our confidence in the conclusion of these studies due to low replication numbers.

*Methods and Results:* We present a Python codebase for random-forest machine learning segmentation and 3D leaf anatomical traits quantification which dramatically reduces the time required to process leaf microCT scans. By training the model on 6 hand segmented image slices out of >1500 in the full dataset, it achieves >90% accuracy in background and tissue segmentation, including veins and bundle sheaths grouped together, but not when taken separately.

*Conclusion:* Overall, this 3D segmentation and quantification pipeline can reduce one of the major barriers to using microCT imaging in high-throughput plant phenotyping.

**KEY WORDS (3-6):** plant leaf anatomy, plant phenotyping, random-forest classification, microCT, image segmentation

## INTRODUCTION

Leaves are complex and highly sophisticated 3D geometries optimized over the course of evolutionary time to balance water distribution, photosynthesis, and structural integrity, among many other biological functions. Yet only recently has imaging technology enabled a clear view and, more importantly, the capacity to digitally represent leaf 3D anatomy (Théroux-Rancourt et al., 2017). Today, 3D imaging permits precise spatial measurement and biophysical modeling of leaf internal geometry that can deliver novel insights about basic leaf function, such as CO<sub>2</sub> transport (Ho et al., 2016; Lehmeier et al., 2017; Earles et al., 2018, 2019; Lundgren et al., 2019), H<sub>2</sub>O transport (Scoffoni et al., 2017), and mechanical structure (Pierantoni et al., 2019). Embracing the 3D complexity of leaf geometry permits us to understand when dimensionality reduction is tolerable and will ultimately guide more precise mechanistic scaling from tissue to crop/ecosystem.

Computationally, 3D imaging often produces large datasets (>20 Gb) with hundreds to thousands of digital cross sections that do not immediately yield biologically relevant information. Image-based sensors measure the spatial distribution of energy intensity across some range of the electromagnetic spectrum, such as gamma, X-ray or visible light. Regardless of the imaging modality, 3D images must be subsequently processed to extract biologically relevant information, such as tissue type, chemical composition, and material type. In the case of X-ray micro-computed tomography (microCT) applied to plant leaves, this has led to the 3D description of the complex organization of the mesophyll cells and their surface area (Ho et al., 2016; Théroux-Rancourt et al., 2017), and the description of novel anatomical traits related to the intercellular airspace (Lehmeier et al., 2017; Earles et al., 2018). Tissue segmentation can be done quickly using both proprietary and open source software via 3D thresholding based on pixel intensity values. However, in the case of leaf microCT scans, pixel intensity can primarily, and most often solely, distinguish between water-filled cells and air-filled void areas. As such,

*Théroux-Rancourt et al. – Leaf microCT and machine learning*

quick segmentations can generally only label cells and airspace, especially when using phase contrast reconstruction (Théroux-Rancourt et al., 2017), such that the different tissues of a leaf, e.g. the epidermis, the bundle sheaths, and the veins, are grouped together. Using this method, there is not a clear distinction between the background and the intercellular airspace, and thus is limited to segmentation to small leaf volumes consisting solely of mesophyll cells and airspace to estimate leaf porosity and cell surface area, traits commonly measured when related to photosynthetic efficiency (e.g. Ho et al., 2016). However, such small volumes can not necessarily represent the whole leaf, and as such larger volume including veins are needed to avoid sampling bias. To separate the leaf from the background and segment the different tissues within the leaf, current applications generally rely on the onerous process of hand-segmentation, i.e. drawing with a mouse or a graphic tablet over single slices of a microCT scan to delimit and assign a unique value to each of the different tissues, either slice-by-slice or through the interpolation between different delimited regions throughout the scan (Théroux-Rancourt et al., 2017). As a result, studies incorporating 3D microCT datasets have been limited to smaller scanning endeavors, and the low replicability of these studies limits the impact of conclusions therein. Hand segmentation, as described above, can take up to one day of work for a coarse scale segmentation of tissues other than mesophyll cells and airspace. Further, to highlight natural variations in size and curvature of the various tissues can substantially increase hand segmentation time (see for example Harwood et al. (2019) on a similar issue using serial block face scanning electron microscopy). Hence, segmentation is currently a major bottleneck in the use of this technology.

Machine learning (ML) presents an opportunity to substantially accelerate the image segmentation process for plant biological applications. Conventional computer vision techniques rely on a human to engineer and select visual features, such as shape, pixel intensity, and texture, that ultimately guide the underlying segmentation process. On the other hand, ML-

*Théroux-Rancourt et al. – Leaf microCT and machine learning*

based image processing allows the machine to directly select visual features in the case of random forest, k-nearest neighbors, support vector machines, for instance, and even engineer the features in the case of convolution neural networks (e.g. Çiçek et al. 2016). ML-based image processing techniques fall along a continuum of unsupervised to supervised learning, which defines the degree to which the machine uses ground-truth data for guiding its optimization function. Given the large number of images generated during an X-ray microCT scan, ML-based image processing could lead to major efficiency gains in terms of human effort, enabling higher sample throughput and more complete data utilization as outlined above. In this study, we present a random forest ML technique for image segmentation, test model performance on an X-ray microCT image of a leaf, and demonstrate how the rich 3D output can be used to extract biologically meaningful metrics from these segmented images.

## **METHODS AND RESULTS**

### **Random forest segmentation and leaf traits analysis pipeline**

The following pipeline was built for our projects using X-ray synchrotron-based microCT imaging and uses freely available and open source software ImageJ (Schneider et al., 2012) and the Python programming language for machine-learning segmentation and for image analysis. Synchrotron-based imaging allows reconstruction of scans using both gridrec (Dowd et al., 1999) and phase contrast, also known as paganin reconstruction (Paganin et al., 2002), both of which were at the base of our previous method (Théroux-Rancourt et al., 2017). In its current state, the program needs the gridrec and phase contrast reconstructions, both in 8-bit depth. To prepare for model training and automated segmentation, one needs to prepare hand labelled slices. Using ImageJ, we first binarize, i.e. convert to black and white, the two reconstructions by applying a threshold, where grayscale values below are considered air and above are considered cells. Those two binary stacks are combined together as in Théroux-

*Théroux-Rancourt et al. – Leaf microCT and machine learning*

Rancourt et al. (2017). Hand labelling is then done directly in ImageJ by drawing around each other tissue, repeating the tissue labelling over the desired number of slices. In this case tissues used include both epidermises, bundle sheaths, and veins, and a custom ImageJ macro is applied to create a hand labelled stack, also included the background as a segmented element. For a detailed methodology on preparing hand labelled slices, including ImageJ macros, please refer to the repository of this program ([github.com/plant-microct-tools/leaf-traits-microct](https://github.com/plant-microct-tools/leaf-traits-microct)).

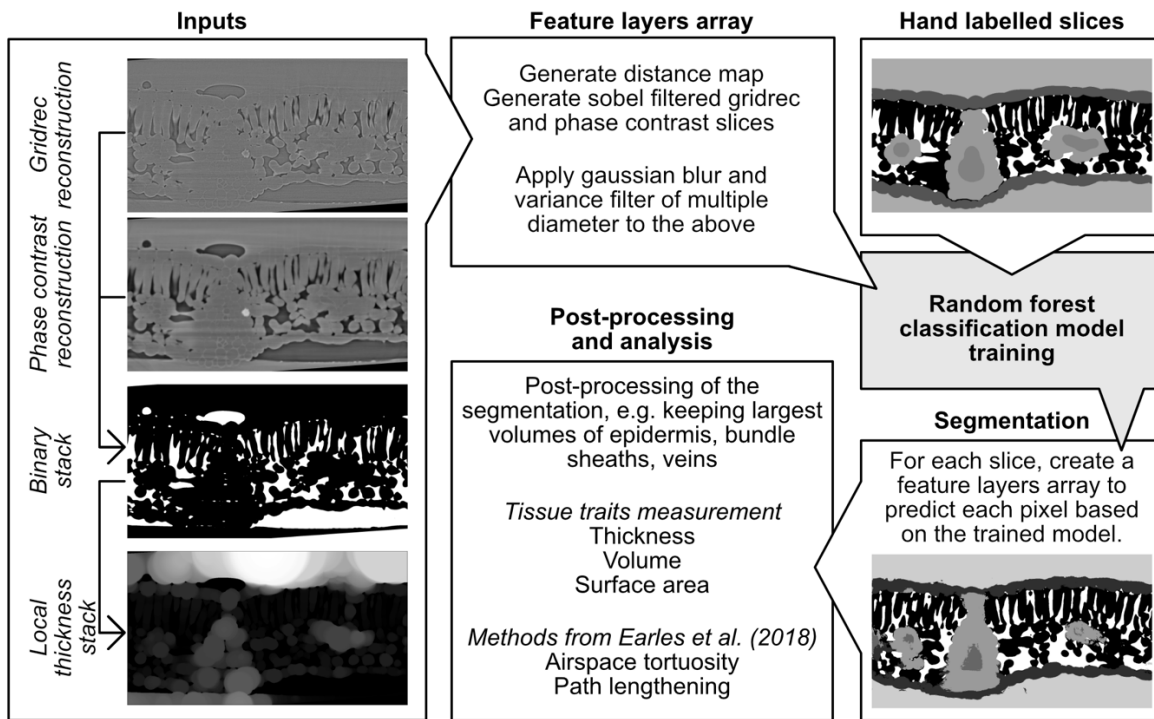

**Figure 1.** Schematic of the segmentation and analysis pipeline. Reconstructed microCT scans are manually thresholded to find the best value to segment the airspace of the leaf (as in Théroux-Rancourt et al. 2017). Using this binary stack, a local thickness stack is created, which identifies for each pixel the diameter of the largest sphere contained in that area (lighter pixel values mean larger diameters). These inputs stacks are used to generate the feature layers arrays needed, along with the hand labelled slices, for the random forest classification model training. With the trained model, the complete stack of images is predicted, and from this predicted stack the image is post-processed to remove false classifications, and leaf traits are analyzed. Note that all images are from the same position within the stack (i.e. same slice) except for the segmented image: the same slice as was hand labelled provides identical segmentation.

*Théroux-Rancourt et al. – Leaf microCT and machine learning*

The random-forest classification model can then be trained using the hand labelled slices. We used a custom Python 3.7 program using numpy (Oliphant, 2006) for data structure, scikit-image (van der Walt et al., 2014) for image processing, and scikit-learn (Pedregosa et al., 2011) for random-forest machine learning functions. The image processing and random-forest classification is summarized in Figure 1. First, the software requires the gridrec and phase contrast stacks as inputs images. It then creates a binary image (as defined above) using the threshold values for both stacks as input variables in order to create a local thickness map, which identifies for each pixel the diameter of the largest sphere contained in that area to provide additional information for model training. Feature layer arrays for each slice that have been hand labelled are then built by applying a gaussian blur or a variance filter, both of different diameters, to the gridrec and phase contrast slices, as well as to sobel filtered gridrec and phase contrast slices for edge detection, and to a distance map. These feature layer arrays are then used, along with the hand labelled slices, to train the random-forest classification model, and this model is used to predict each slice, generally > 1500, of the microCT scan. The full stack prediction can be then passed on to the leaf traits analysis pipeline. A first step is to identify all tissues and apply post-prediction correction to remove false predictions, such as identifying the two largest epidermis structures of similar volumes for a laminar leaf, and removing volumes of vein and bundle sheaths below a certain volume. From this corrected stack, biological metrics are computed, including thickness measured at each point along the leaf surface (e.g. whole leaf, abaxial and adaxial epidermis separately, whole mesophyll (leaf without the epidermis), all including standard deviation), volumes of all segmented tissues (i.e. voxel count), and surface area of the mesophyll cells connected to the airspace (through a marching cube algorithm). Further analysis of the airspace can be made to compute tortuosity and path lengthening using a python-version of Earles et al. (2018) methods, which are not included in the current methods analysis.

*Théroux-Rancourt et al. – Leaf microCT and machine learning*

### **Testing the segmentation program**

To test the performance of the segmentation program, we use the microCT scan of a 'Cabernet sauvignon' grapevine (*Vitis vinifera* L.) leaf acquired at the TOMCAT tomographic beamline of the Swiss Light Source (SLS) at the Paul Scherrer Institute in Villigen, Switzerland. Samples were prepared for microCT scanning as in Théroux-Rancourt et al. (2017), and the sample was mounted between pieces of polyimide tape and fixed upright in a styrofoam holder. Using the CT mode, 1801 projections of 100 ms were acquired at 21 keV over 180° total rotation using a 40x objective, yielding a final pixel size of 0.1625 µm. The scans were reconstructed using gridrec and paganin algorithms using the reconstruction pipeline at the TOMCAT beamline. Twenty-four slices spread evenly across the full 1920 slices stack were hand labelled for epidermis, background, veins, and bundle sheaths, mesophyll cells, and intercellular airspace as briefly described above. To facilitate the testing, the x and y dimensions were halved, yielding a pixel size of 0.325 µm in those dimensions, but keeping the original dimensions in the depth (z) dimension, hence reducing the file size by four down to 1.5 Gb, a size easily handled by the program (hereafter called 20x magnification). The file was resized again and halved a second time in the x and y dimensions (pixel size of 0.650 µm, hereafter called 10x magnification) to evaluate how a lower number of pixels affect model predictions. This latter pixel size is commonly used in leaf microCT scans done at the Advanced Light Source at the Lawrence Berkeley National Lab (e.g. Scoffoni et al., 2017; Théroux-Rancourt et al., 2017; Earles et al., 2018), while the 20x magnification is our current standard for scans done at the SLS. To understand the impact of training a model on different numbers of manually segmented slices, we tested the software using one to 12 training slices (with an equal number of testing slices), repeating training 30 times at each training level using randomly selected slices, and repeating that for the 20x and 10x stacks. Each prediction test consisted of segmenting all of the 24 slices that were hand labelled. Confusion matrices were created for



*Théroux-Rancourt et al. – Leaf microCT and machine learning*

each prediction test, removing the slices that were used in the model training. Note that no post-prediction corrections were applied and as such the results below present the raw predictions.

From each confusion matrix, we evaluated precision and recall for each biological class (Figure 2). In the context of automated information retrieval for microCT image segmentation, recall may be interpreted as the sensitivity of the trained model to a given pixel class, i.e. the portion of correctly identified pixels in a given class, relative to all pixels belonging to this class. On the other hand, precision represents the positive predictive value of the model within a given pixel class, i.e. the number of pixels correctly identified as belonging to a given class, divided by this value plus the number of pixels falsely identified. It can be logically deduced why some people refer to recall as *quantity* of positive identification, and precision as the *quality* of positive identification.

In the mesophyll cell class, recall was generally > 90% even when training on < 3 manually segmented slices, meaning that > 90% of all mesophyll cell pixels were correctly identified as cells, suggesting the trained random forest model is highly sensitive to cells. The same can be said for the airspace and background classes, which plateau at about 95% recall using >1 training slice. The trained models do not appear to be as sensitive to pixels of the epidermis class. Indeed, we observed a minimum of 4 training slices required to drive epidermis class recall into the 90%+ range. With vein and bundle sheath considered together as one class, at least 4 training slices were required to reach a maximum recall value of ~80%; the remaining 20% were false negatives, i.e. identified as other classes. Interestingly, when separating bundle sheath and vein into distinct classes, the bundle sheath class also reaches a maximum recall value of ~75% using >4 training slices. Isolating the vein class from bundle sheath, greatly impacts the trained model's sensitivity to detection of vein. Recall was not observed above 55%, and generally stayed under 40% unless the model was trained on > 8 manually segmented slices.

*Théroux-Rancourt et al. – Leaf microCT and machine learning*

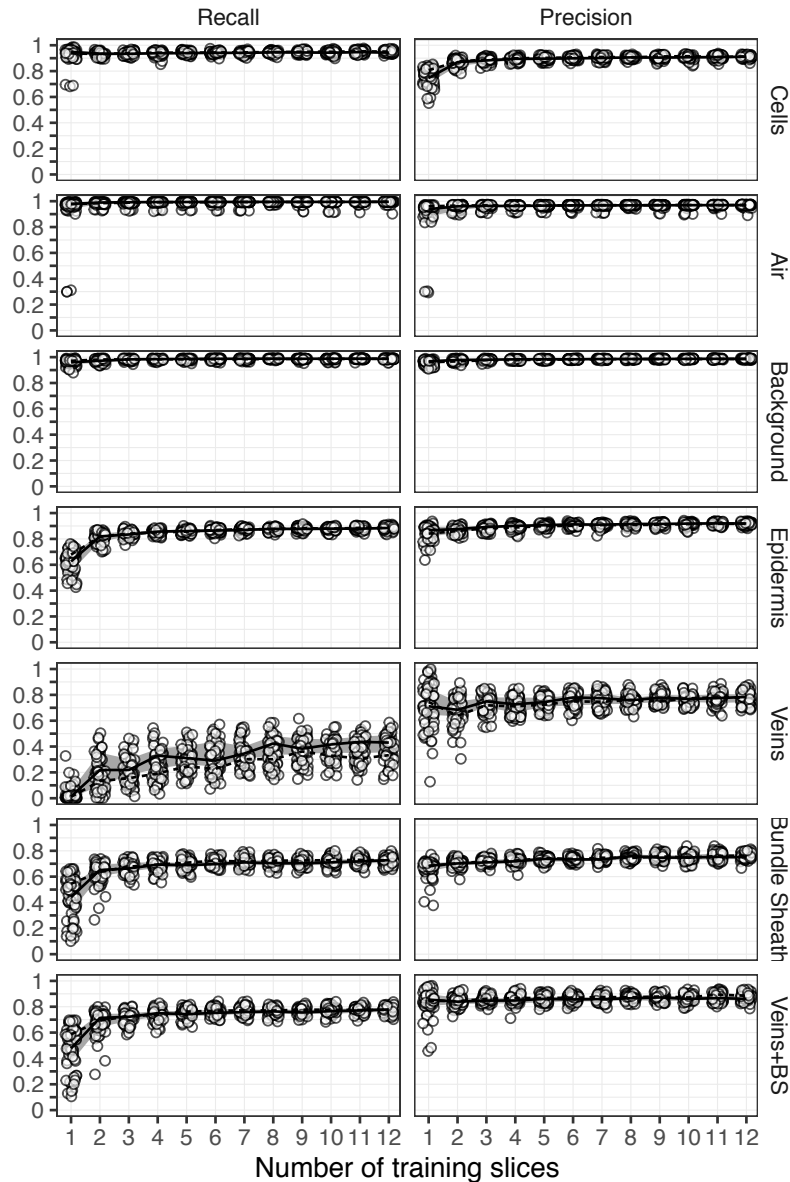

**Figure 2.** Recall (left) and precision (right) as a function of the number of training slices used to predict tissue classes in a microCT leaf scan of 20x magnification (pixel size: 0.325  $\mu\text{m}$ ; 762 999 pixels per slice to predict). Solid lines represent the median value of 30 prediction per amount of training slices, and gray ribbons represents the 25th and 75th quantiles. Dashed lines present the median value of 30 predictions done on the same leaf scan, but with size divided in half so that each class as approximately four times less pixels (pixel size: 0.65  $\mu\text{m}$ ; representing a 10x magnification). Precision and recall differences between magnifications are presented in Supplemental Figure S1.

*Théroux-Rancourt et al. – Leaf microCT and machine learning*

To achieve precision > 90% in the airspace, background, and epidermis tissue classes a minimum of 2 training slices should be used. Interestingly, training on > 2 slices did not seem to translate to a substantial improvement in precision for these classes. However, observed precision for the mesophyll cell tissue class did not plateau until training on > 3 slices. While the maximum precision for mesophyll cells was stably > 90%, the lower precision values consistently observed when training on 1 or 2 slices, as low as 60%, suggest the software is not as reliable for this tissue class. So, it is important to train on > 3 slices if mesophyll cell traits are of importance. In the vein class, the software was observed to positively identify pixels at a rate of about 80% when trained on > 2 slices. In other words, even though the software is not very sensitive to the vein class, it is quite reliable when it does make a positive identification in the vein class.

To evaluate how the number of training slices affected the measurement of biological traits, a subset of at least five predictions from the 20x magnification were segmented over the full stack. These full stack predictions were then passed through the leaf traits analysis program to extract relevant leaf anatomical traits. Anatomical measures were the least constant between prediction when using one training slice (Figure 3). The most variable were the epidermises thickness estimates, with values near 0  $\mu\text{m}$  for the abaxial epidermis, or close to 30  $\mu\text{m}$  in the adaxial epidermis, meaning that false segmentations of epidermis occurred between both epidermises such that they were connected and could not be automatically distinguished from one another as happened from 3 training slices onward. This false segmentation of the epidermis led to a highly variable whole mesophyll thickness (i.e. the leaf without the epidermis), which became less variable (< 5%) when using at least 3 training slices. However, the overall leaf thickness was the least variable, with less than ~1.5  $\mu\text{m}$  variation (~1% total thickness) when using 3 or more training slices, a variation we consider equal or even lower than manual measures. This technique benefits greatly from measuring over each point, or voxel column, of

*Théroux-Rancourt et al. – Leaf microCT and machine learning*

the leaf area, allowing for the integration of millions of thickness measures, thus buffering local errors due to false segmentation. Volumetric anatomical traits became constant in variation and values at a minimum of 5 training slices for the bundle sheath, mesophyll cells, and the airspace. As with precision and recall, vein volume substantially varied until about 7 training slices, where values and variation plateaued. Volumes of the leaf, the whole mesophyll and epidermises exhibited similar results as for their thickness.

**How many slices should be hand labeled?**

In the test presented above, the greater the number of total pixels represented by any class, the fewer training slices required to reach maximum sensitivity (i.e. recall). For example, the air, cells, and background classes are the most common pixel types and clearly show >90% sensitivity (recall) training on as few as 2 manually segmented slices (Figure 2), and with 4 slices different models generated similar biological traits (Figure 3). Veins and bundle sheaths are difficult to segment as they generally present very low contrast between each other and as such are difficult to distinguish computationally. In the usage we have made of the program, we are generally interested in defining where the vasculature (veins and bundle sheath together) is rather than extracting traits of those two tissues, and as such 6 slices seem appropriate to get a reliable prediction of the volume of those two tissues (Figures 2 and 3). Further, the number of testing slices do not influence precision or recall (Supplemental Figure S3), and hence about three supplementary testing slices should be enough for testing the model as it is trained and for the user's own testing of precision and recall. More problematic is when a class is represented by a smaller number of pixels, the number of training slices required to reach maximum sensitivity in this class increases (Figure 2). Thinner tissues, like the epidermis, require a minimum of 5 training slices to reach constant precision, recall, and biological traits. However, if magnification is decreased to 10x (~4x fewer pixels in all classes), about 8 training slices are

*Théroux-Rancourt et al. – Leaf microCT and machine learning*

needed to reach a plateau in precision and recall (Figure S1). Hence, care should be taken when planning a scanning endeavor to have the right magnification to have enough pixels per tissue of interest in order to facilitate subsequent segmentation. Using the number of slices testing above on previous scans could help guide microCT setup.

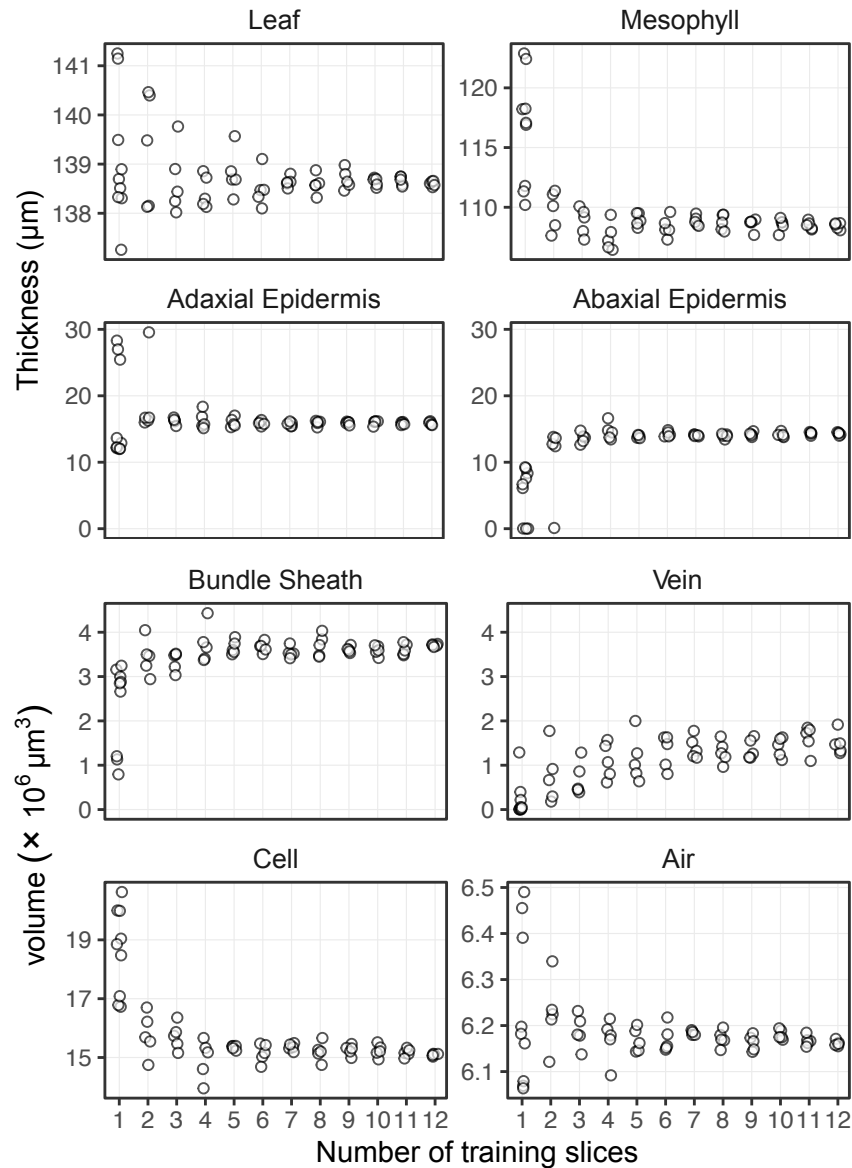

**Figure 3.** Variation in the measured tissue thicknesses and volumes based on the number of training slices used. False classification of inner leaf pixels as epidermis occurs more with one or two training slices, which resulted in the two epidermis being connected together, hence making the individual thickness estimates wrong. Standard deviations of the thickness estimates are presented in Supplemental Figure S2.

## CONCLUSION

We present here a tool using open source software to automatically segment image stacks of microCT scans consisting of thousand of single images and requiring only a few hand labeled single slices. This segmentation and analysis pipeline has been successfully used on a variety of species and leaf forms (e.g. deciduous and evergreen laminar leaves, C3 grass leaves, conifer needles), and is not limited to the tissues extracted above (Figure 4). We are confident it can be used on other plant material, such as different types of seeds, fruits, stems, and roots, to produce high quality segmentations. However, certain tissues are not evenly segmented, and do not present the expected biological pattern. For example, veins and bundle sheath present local volume errors, constricting and expanding where they should be even from slice to slice. Using a slice-by-slice, 2D model training and segmentation approach can enhance this, and other machine learning methods can probably perform better on this front (e.g. Çiçek et al., 2016). However, we provide a simple tool that can be run on a regular workstation, without the requirement of special infrastructure such as a GPU cluster, for example. This tradeoff was acceptable for the majority of our work. Further, models are currently generated for single scans and have yielded poor results when applied to other scans even of the same scanning sessions and the same species (i.e. similar settings and material). Again, this was an acceptable tradeoff as it significantly speeded up the processing of microCT scans, which was the aim for the tool. Future milestone would be to implement 3D learning to better account for continuous and regular tissues, and make the trained model usable for similar scans (e.g. same sessions, species, and material).

To conclude, this segmentation tool generates a considerable amount of segmented leaves over a wide array of species, and empowers researchers to broaden sampling, to ask new questions about the 3D structure of leaves, and derive new and meaningful metrics for biological structures.

*Théroux-Rancourt et al. – Leaf microCT and machine learning*

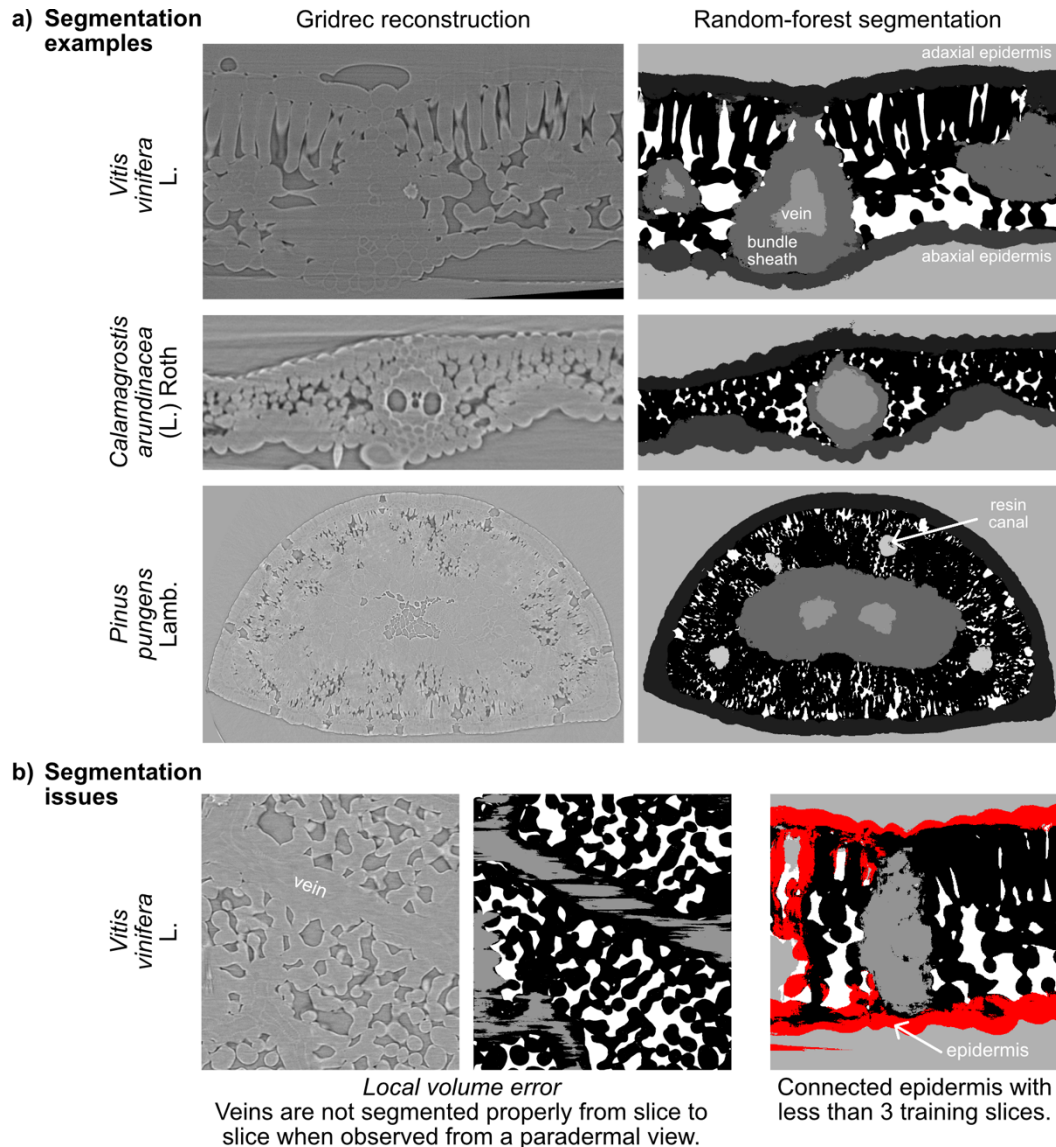

**Figure 4.** Random-forest segmentation examples (a) for a grapevine leaf, a grass, and a pine needle, and common segmentation issues (b). Gridrec reconstructions on the same slices are shown on the left to compare with the predicted tissues based on random-forest models trained on hand-labelled slices. One of the main segmentation issues is the local volume problem, caused by 2D rather than 3D segmentation, where for example veins are labelled on one slice and not on the other (black areas in between grey-labelled veins). Another issue is having the epidermis connected throughout the leaf at small number of model training slices, here highlighted in red, where a volume might appear disconnected in 2D but is connected in 3D.

*Théroux-Rancourt et al. – Leaf microCT and machine learning*

## **ACKNOWLEDGEMENTS**

We would like to thank Klara Voggeneder for hand labelling the microCT test scan and for improving the hand labelling method, Santiago Trueba for providing the images for *Pinus pungens*, and Goran Lovric at the Swiss Light Source for assistance during beamtime. GTR was supported by a FWF Austrian Science Fund Lise-Meitner Fellowship (project M2245-B32).

## **AUTHORS CONTRIBUTIONS**

JME and MRJ conceptualized and programmed the random forest segmentation program, with assistance from GTR. GTR programmed the leaf traits analysis and the segmentation testing, with assistance from MRJ. GTR acquired and processed the microCT test scan at the SLS. EJF tested and commented on the segmentation program during the development. GTR, MRJ, and JME wrote the paper, with revisions from all authors. AM and CRB provided funding and access to data.

## **DATA ACCESSIBILITY STATEMENT**

The code for analysis suite is available online at [github.com/plant-microct-tools/leaf-traits-microct](https://github.com/plant-microct-tools/leaf-traits-microct), and future updates will be integrated to this repository.

## **LITERATURE CITED**

- Çiçek, Ö., A. Abdulkadir, S. S. Lienkamp, T. Brox, and O. Ronneberger. 2016. 3D U-Net: Learning Dense Volumetric Segmentation from Sparse Annotation. *Medical Image Computing and Computer-Assisted Intervention – MICCAI 2016*, 424–432.
- Dowd, B. A., G. H. Campbell, R. B. Marr, V. V. Nagarkar, S. V. Tipnis, L. Axe, and D. P. Siddons. 1999. Developments in synchrotron x-ray computed microtomography at the



*Théroux-Rancourt et al. – Leaf microCT and machine learning*

- National Synchrotron Light Source. *In* U. Bonse [ed.], SPIE's International Symposium on Optical Science, Engineering, and Instrumentation, 224–236. SPIE.
- Earles, J. M., T. N. Buckley, C. R. Brodersen, F. A. Busch, F. J. Cano, B. Choat, J. R. Evans, et al. 2019. Embracing 3D Complexity in Leaf Carbon-Water Exchange. *Trends in plant science* 24: 15–24.
- Earles, J. M., G. Théroux-Rancourt, A. B. Roddy, M. E. Gilbert, A. J. McElrone, and C. R. Brodersen. 2018. Beyond Porosity: 3D Leaf Intercellular Airspace Traits That Impact Mesophyll Conductance. *Plant Physiology* 178: 148–162.
- Harwood, R., E. Goodman, M. Gudmundsdottir, M. Huynh, Q. Musulin, M. Song, and M. M. Barbour. 2019. Cell and chloroplast anatomical features are poorly estimated from two-dimensional cross sections. *New Phytologist*. Accepted Author Manuscript.  
doi:10.1111/nph.16219
- Ho, Q. T., H. N. C. Berghuijs, R. Watté, P. Verboven, E. Herremans, X. Yin, M. A. Retta, et al. 2016. Three-dimensional microscale modelling of CO<sub>2</sub> transport and light propagation in tomato leaves enlightens photosynthesis. *Plant, Cell & Environment* 39: 50–61.
- Lehmeier, C., R. Pajor, M. R. Lundgren, A. Mathers, J. Sloan, M. Bauch, A. Mitchell, et al. 2017. Cell density and airspace patterning in the leaf can be manipulated to increase leaf photosynthetic capacity. *The Plant Journal* 64: 1061.
- Lundgren, M. R., A. Mathers, A. L. Baillie, J. Dunn, M. J. Wilson, L. Hunt, R. Pajor, et al. 2019. Mesophyll porosity is modulated by the presence of functional stomata. *Nature Communications* 10: 1–10.
- Oliphant, T.E., 2006. *A guide to NumPy*, Trelgol Publishing USA.
- Paganin, D., S. C. Mayo, T. E. Gureyev, P. R. Miller, and S. W. Wilkins. 2002. Simultaneous phase and amplitude extraction from a single defocused image of a homogeneous object. *Journal of Microscopy* 206: 33–40.

*Théroux-Rancourt et al. – Leaf microCT and machine learning*

Pedregosa, F., G. Varoquaux, A. Gramfort, V. Michel, B. Thirion, O. Grisel, M. Blondel, et al.

2011. Scikit-learn: Machine Learning in Python. *Journal of Machine Learning Research* 12: 2825–2830.

Pierantoni, M., V. Brumfeld, L. Addadi, and S. Weiner. 2019. A 3D study of the relationship between leaf vein structure and mechanical function. *Acta Biomaterialia* 88: 111–119.

Schneider, C. A., W. S. Rasband, and K. W. Eliceiri. 2012. NIH Image to ImageJ: 25 years of image analysis. *Nature methods* 9: 671–675.

Scoffoni, C., C. Albuquerque, C. R. Brodersen, S. V. Townes, G. P. John, M. K. Bartlett, T. N. Buckley, et al. 2017. Outside-Xylem Vulnerability, Not Xylem Embolism, Controls Leaf Hydraulic Decline during Dehydration. *Plant Physiology* 173: 1197–1210.

Théroux-Rancourt, G., J. M. Earles, M. E. Gilbert, M. A. Zwieniecki, C. K. Boyce, A. J. McElrone, and C. R. Brodersen. 2017. The bias of a two-dimensional view: comparing two-dimensional and three-dimensional mesophyll surface area estimates using noninvasive imaging. *New Phytologist* 215: 1609–1622.

van der Walt, S., J. L. Schönberger, J. Nunez-Iglesias, F. Boulogne, J. D. Warner, N. Yager, E. Guillard, and T. Yu. 2014. scikit-image: image processing in Python. *PeerJ* 2: e453.

### SUPPLEMENTAL MATERIAL

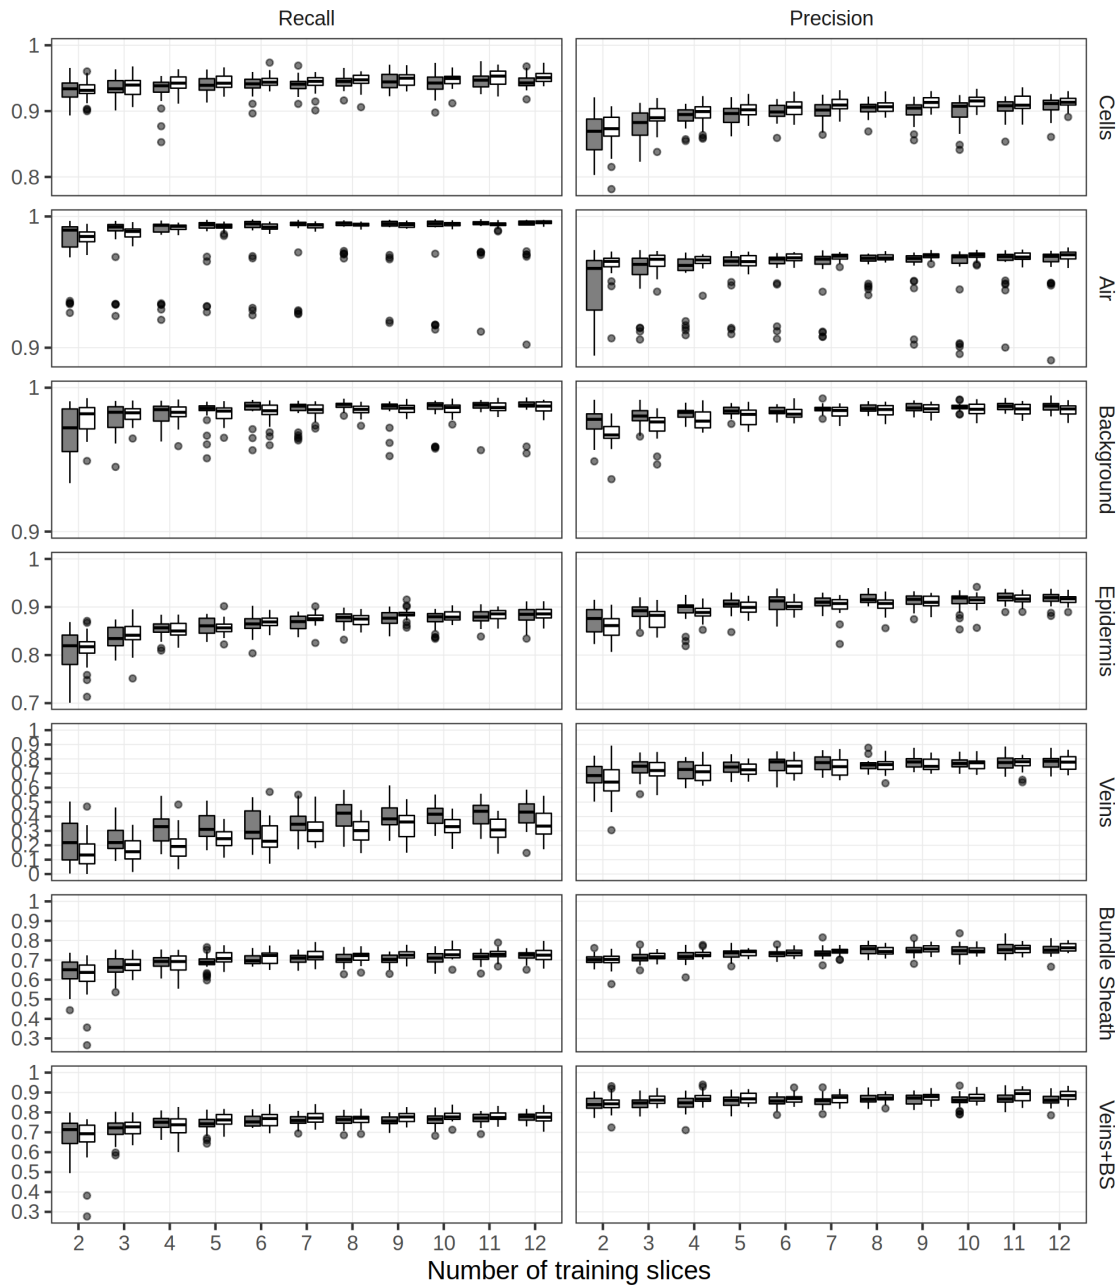

**Figure S1.** Difference between the number of pixels per class and prediction/recall. At 20x magnification (gray, left of boxplot pairs), there is approximately four times more pixels per class than at 10x magnification (white, right of boxplot pair). While 10x and 20x perform similarly for tissues with large volume and reach a precision plateau at a similar slice, for thin tissues like the epidermis, more pixels per class allow to reach a precision plateau about 2 slices earlier (~8 slices at 20x, ~ 10 slices at 10x). Axis zoomed in on the precision and recall values to better show the variation between magnifications. Note that models with only one training slice are not shown.

*Théroux-Rancourt et al. – Leaf microCT and machine learning*

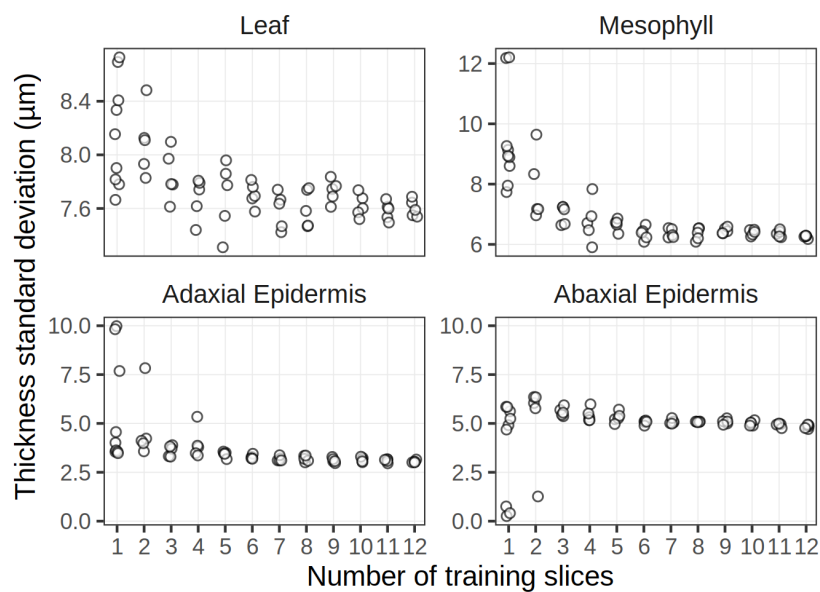

**Figure S2.** Standard deviation of thickness estimates presented in Figure 2.

*Théroux-Rancourt et al. – Leaf microCT and machine learning*

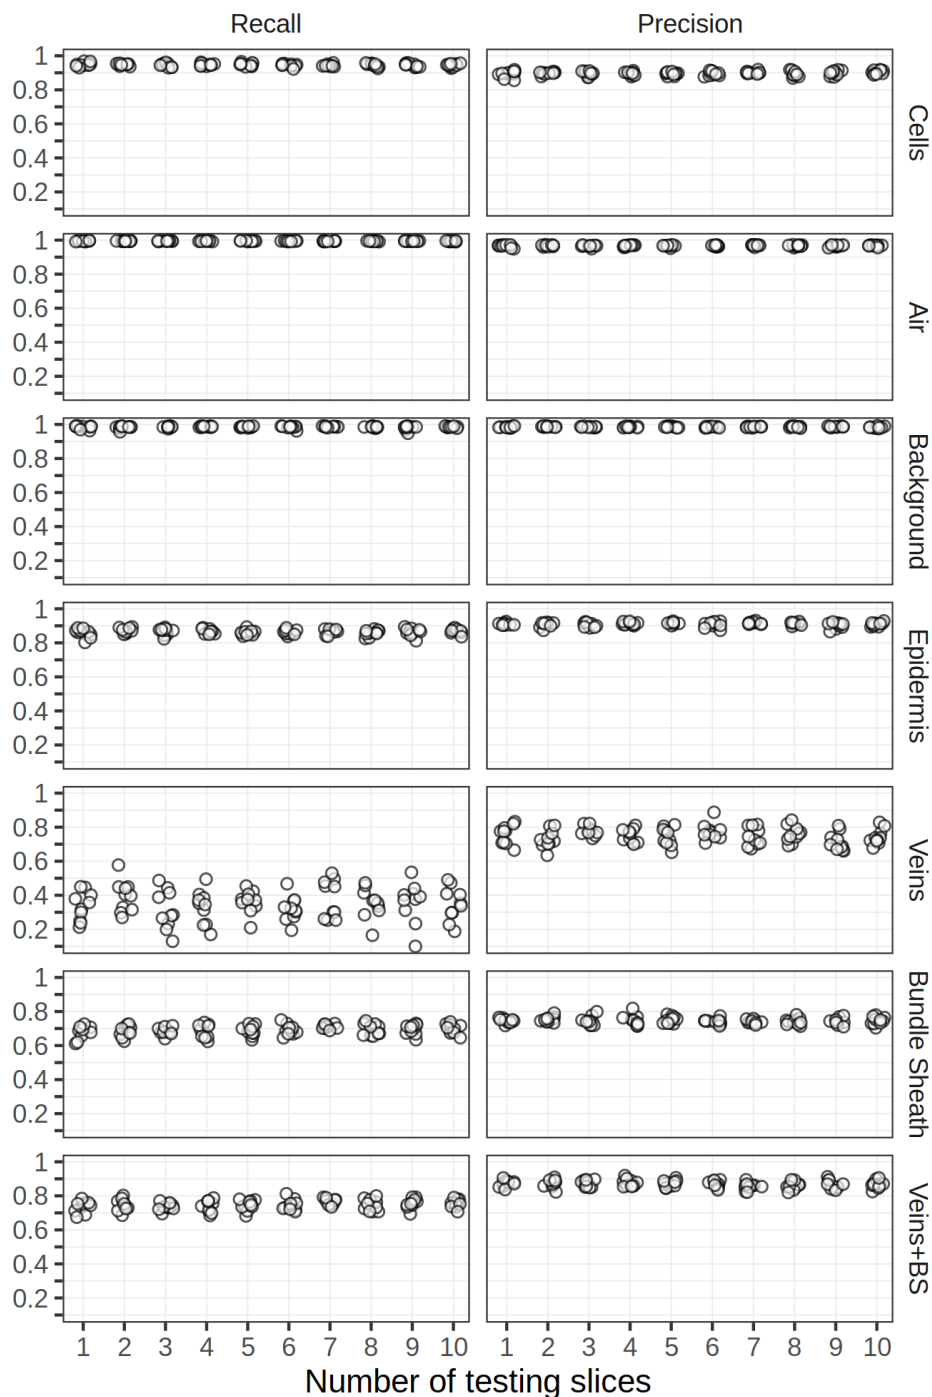

**Figure S3.** Recall (left) and precision (right) using 6 training slices and a variable number of testing slices to predict tissue classes in a microCT leaf scan of 20x magnification (pixel size: 0.325  $\mu\text{m}$ ; 762 999 pixels per slice to predict). Precision and recall range and variation remained constant using one to ten testing slices.
